# Supplementary material for: Assessing the persistence of the N–H⋯N hydrogen bonding leading to supramolecular chains in molecules related to the anti-malarial drug, chloroquine
Source: Royal Society of Chemistry journal article supplement (doi:10.1039/b823058g), 2009-01-01
Supplement: b823058g.pdf [file b823058g.pdf]

**Assessing the persistence of the N–H...N hydrogen bonding leading to supramolecular chains in molecules related to the anti-malarial drug, chloroquine**

**Carlos R. Kaiser,<sup>a</sup> Karla C. Pais,<sup>a</sup> Marcus V. N. de Souza,<sup>b</sup> James L. Wardell,<sup>c,d</sup> Solange M.S.V. Wardell\*<sup>b</sup> and Edward R.T. Tiekink\*<sup>e</sup>**

<sup>a</sup> *Instituto de Química, Departamento de Química Orgânica, Universidade Federal do Rio de Janeiro, CEP 68534, 21941-972 Rio de Janeiro - RJ, Brazil*

<sup>b</sup> *FioCruz – Fundação Oswaldo Cruz, Instituto de Tecnologia em Fármacos – FarManguinhos, Rua Sizenando Nabuco, 100, Manguinhos, 21041-250, Rio de Janeiro, RJ, Brazil. Fax 55.21 2552-0435; Tel: 55 21 2552-0435; E-mail: [solangewardell@yahoo.co.uk](mailto:solangewardell@yahoo.co.uk)*

<sup>c</sup> *Department of Chemistry, University of Aberdeen, Meston Walk, Old Aberdeen, AB24 3UE, Scotland*

<sup>d</sup> *Centro de Desenvolvimento Tecnológico em Saúde (CDTS), Fundação Oswaldo Cruz (FIOCRUZ), Casa Amarela, Campus de Manguinhos, Av. Brasil 4365, 21040-900, Rio de Janeiro, RJ, Brazil*

<sup>e</sup> *Department of Chemistry, The University of Texas at San Antonio, One UTSA Circle, San Antonio, Texas 78249-0698, USA. Fax 1 210 458 7428; Tel: 1 210 458 5774; E-mail: [Edward.Tiekink@utsa.edu](mailto:Edward.Tiekink@utsa.edu)*

**Fig. S1** Molecular structure of (1), showing crystallographic numbering scheme and displacement ellipsoids at the 50% probability level. The non-hydrogen atoms of the molecule are essentially co-planar and the amino-hydrogen atom is directed towards the aromatic system. This geometry is repeated in all of the structures described herein, see Figs S2 – S8.

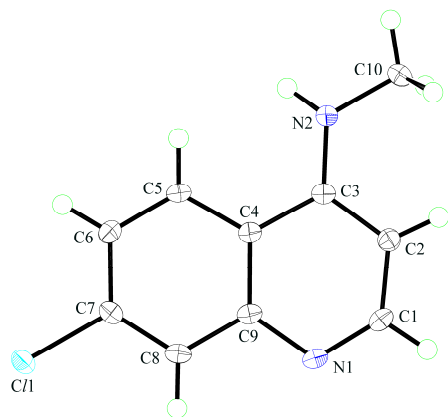

**Fig. S2** Molecular structures of (2), showing crystallographic numbering scheme for the two independent molecules and displacement ellipsoids at the 50% probability level. The root mean square fit between bond distances is 0.011 Å and 0.35° for bond angles, indicating a high degree of similarity between the independent molecules. The N2-bound alkyl chain adopts an extended conformation approximately normal to the plane of the fused rings ( $C3-N2-C10-C11 = -81.4(3)^\circ$  and  $N2-C10-C11-C12 = 177.8(2)^\circ$ ;  $85.4(3)^\circ$  and  $179.0(3)^\circ$  for molecule “a”, respectively).

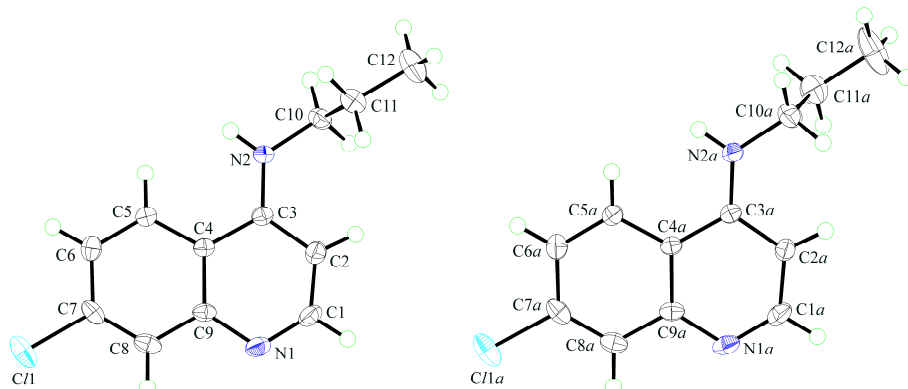

**Fig. S3** Molecular structures of (3), showing crystallographic numbering scheme for the two independent molecules and displacement ellipsoids at the 50% probability level. The root mean square fit between bond distances is 0.005 Å and 0.52° for bond angles, indicating a high degree of similarity between the independent molecules. The n-butyl groups, which adopt an extended conformation, are co-planar with the fused ring systems ( $C3-N2-C10-C11 = -167.6(2)^\circ$  and  $C10-C11-C12-C13 = -174.2(2)^\circ$ ;  $173.1(2)$  and  $178.2(2)^\circ$  for molecule “a”, respectively).

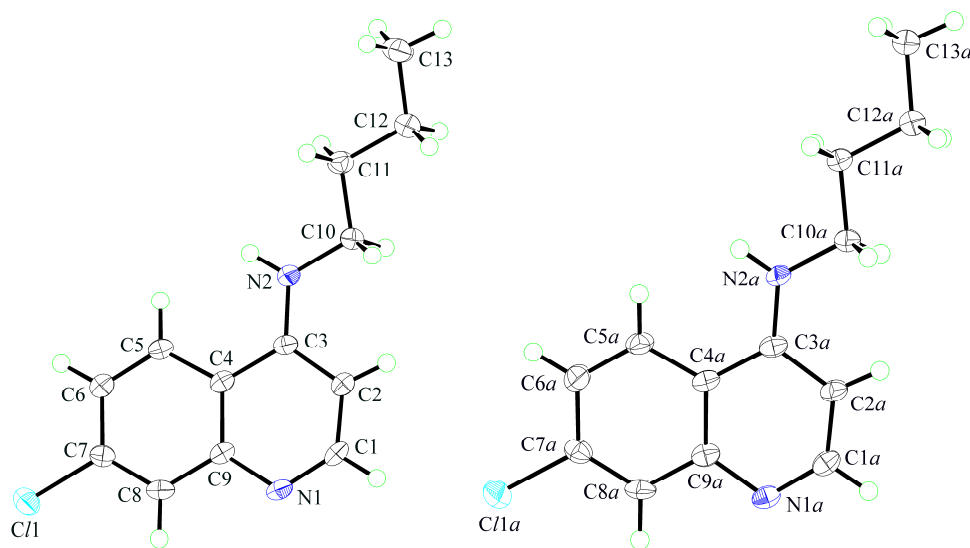

**Fig. S4** Molecular structure of (4), showing crystallographic numbering scheme and displacement ellipsoids at the 50% probability level. The N2-bound substituent tends to fold back over the fused ring system as seen in the  $C3-N2-C10-C11$  and  $N2-C10-C12-C1$  torsion angles of  $-77.7(3)$  and  $-68.6(3)^\circ$ , respectively.

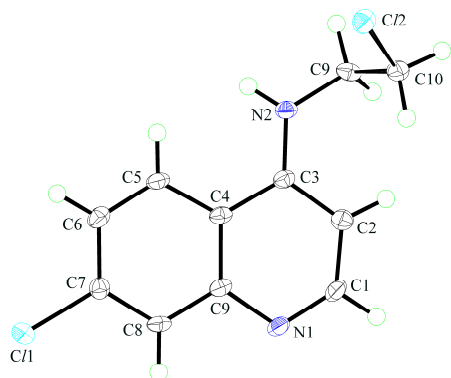

**Fig. S5** Molecular structure of (**5**), showing crystallographic numbering scheme and displacement ellipsoids at the 50% probability level. The N2-bound substituent tends to fold back over the fused ring system as seen in the C3-N2-C10-C11 and N2-C10-C12-N3 torsion angles of 79.8(3) and 62.3(3)°, respectively.

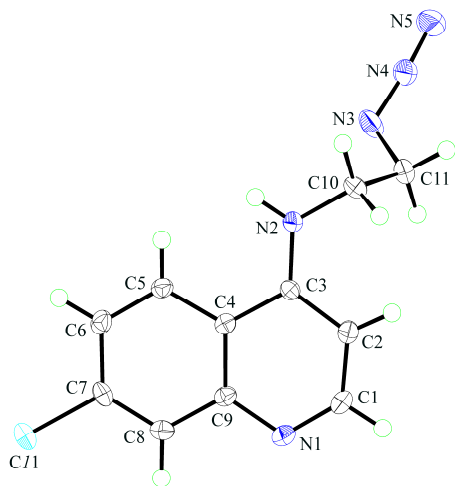

**Fig. S6** Views of the crystal packing in (**1**): (a) a layer comprising parallel supramolecular chains, and (b) projection down the *a*-axis emphasising the stacking of layers. Colour code in this and diagrams shown in Figs S7 – S10: chloride, cyan; nitrogen, blue; carbon, grey; and hydrogen, green. For reasons of clarity, only those hydrogen atoms engaged in hydrogen bonding are shown.

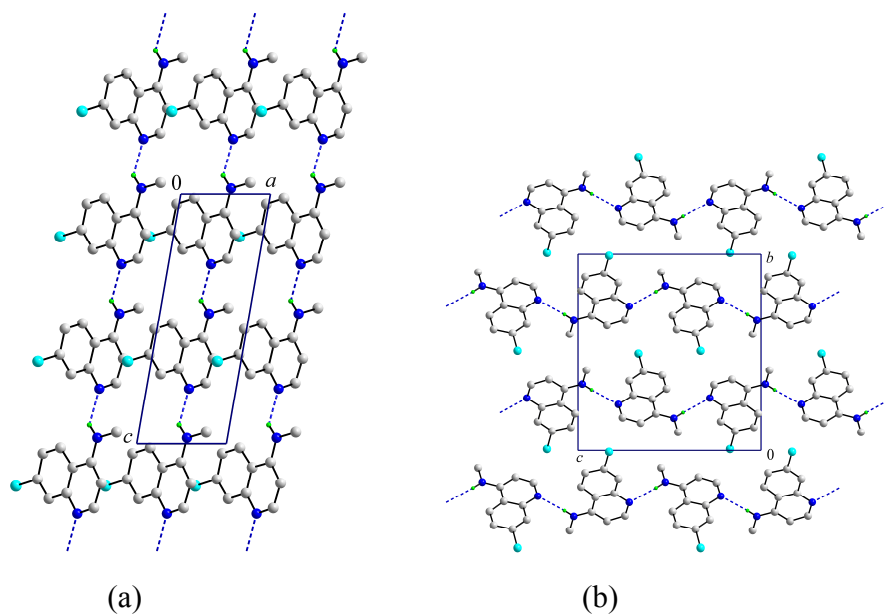

**Fig. S7** Views of the crystal packing in (2): (a) a layer comprising anti-parallel supramolecular chains, and (b) projection down the *a*-axis emphasising the stacking of layers.

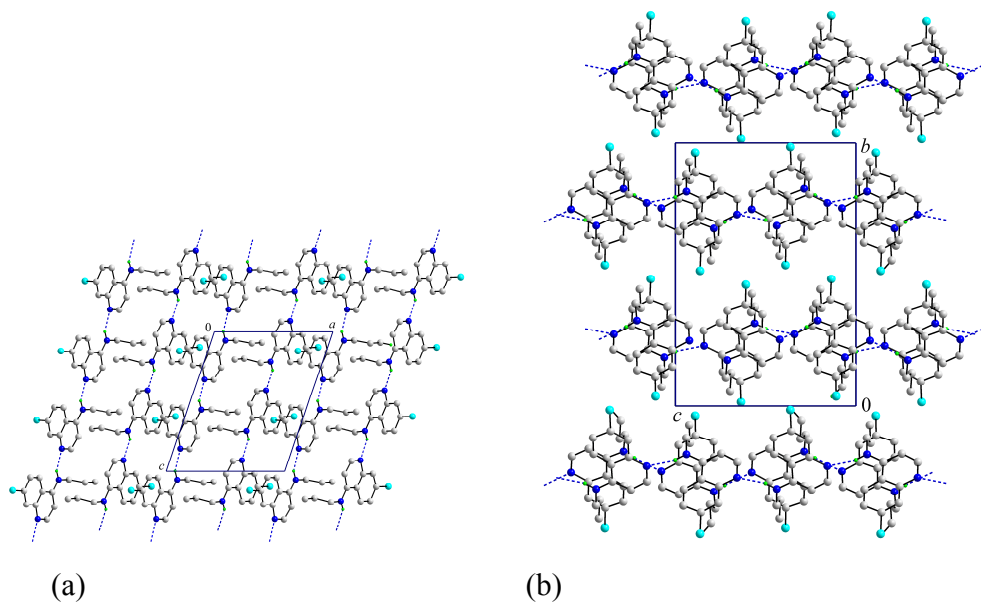

**Fig. S8** Views of the crystal packing in (3): (a) a layer comprising anti-parallel supramolecular chains, and (b) projection down the *a*-axis emphasising the stacking of layers.

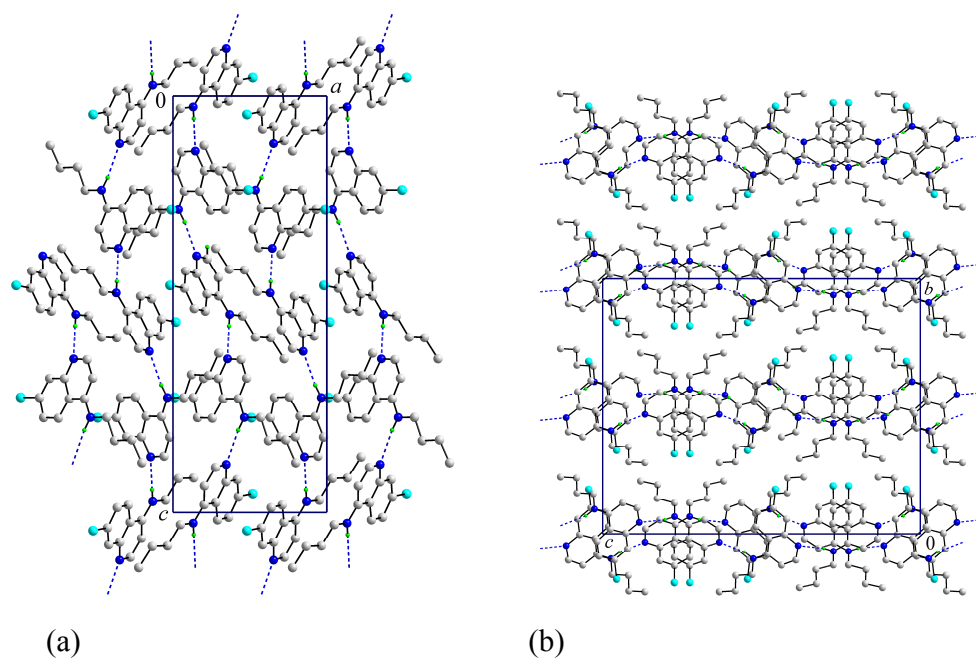

**Fig. S9** Views of the crystal packing in (4): (a) a layer comprising parallel supramolecular chains, and (b) projection down the *a*-axis emphasising the stacking of layers.

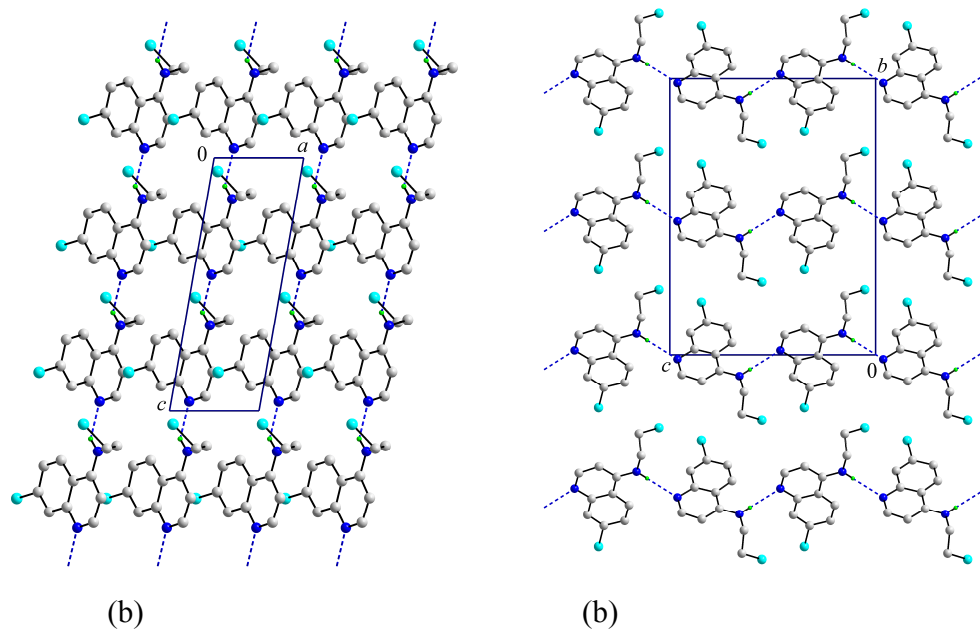

**Fig. S10** View of the crystal packing in (5): a layer comprising anti-parallel supramolecular chains.

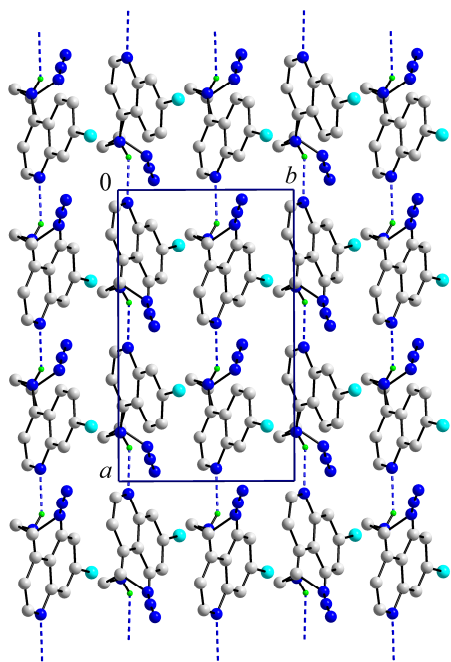

**Fig. S11** Molecular structure of (6), showing crystallographic numbering scheme and displacement ellipsoids at the 50% probability level.

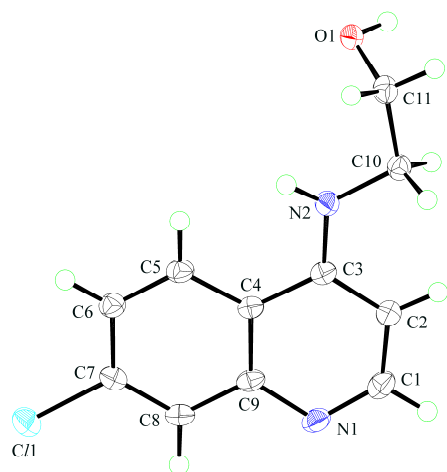

**Fig. S12** Molecular structure of (7), showing crystallographic numbering scheme and displacement ellipsoids at the 50% probability level.

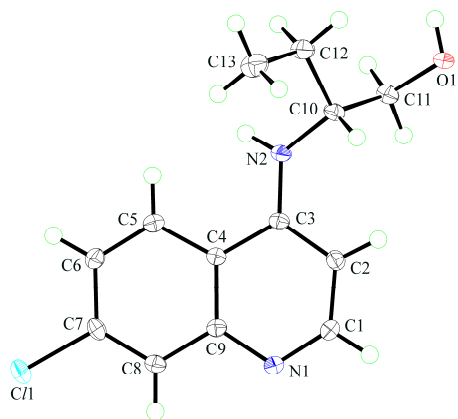

**Fig. S13** Molecular structure of **(8)**, showing crystallographic numbering scheme and displacement ellipsoids at the 70% probability level.

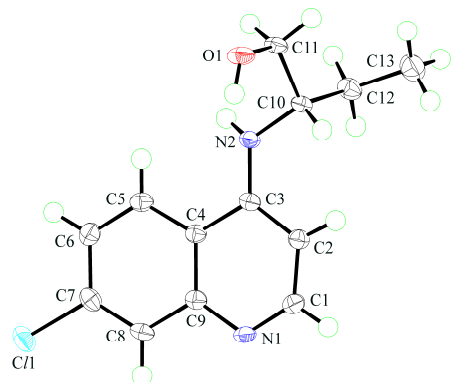

**Fig. S14** A side-on view of a layer in **(6)** emphasising the undulating topology. Colour code in this and subsequent diagrams: chloride, cyan; oxygen, red; nitrogen, blue; carbon, grey; and hydrogen, green. For reasons of clarity, only those hydrogen atoms engaged in hydrogen bonding are shown.

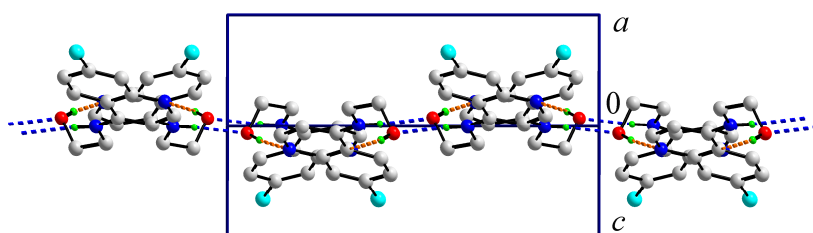

**Fig. S15** A side-on view of a layer in **(7)** emphasising the jagged topology.

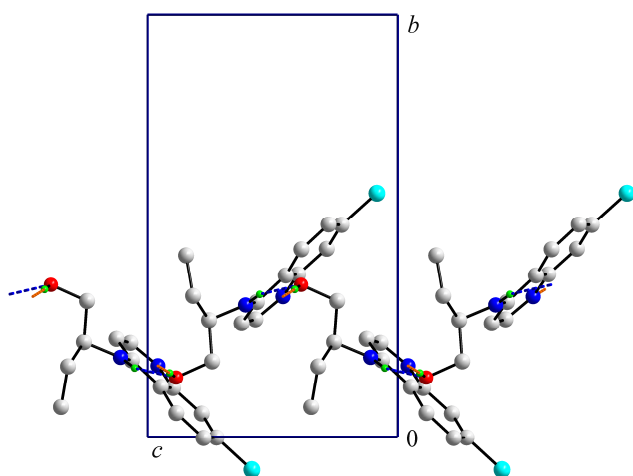



**Fig. S16** Views of the crystal packing in (8): projection down the *a*-axis emphasising the inter-digitation of layers.

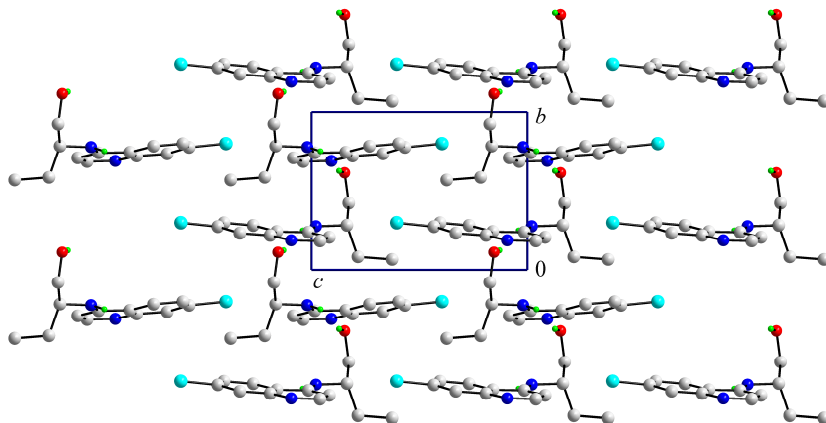

## Characterisation

### *Characterisation methods*

Melting points were determined on a Buchi apparatus and are uncorrected. Infrared spectra were recorded on a Thermo Nicolet Nexus 670 spectrophotometer as KBr pellets and frequencies are expressed in  $\text{cm}^{-1}$ . Mass spectra (CG/MS) were recorded on an Agilent Technologies 6890/5972A mass spectrometer. NMR spectra were recorded at room temperature on a Bruker Avance 500 spectrometer operating at 500 or 400 MHz ( $^1\text{H}$ ) and 125 or 100 MHz ( $^{13}\text{C}\{^1\text{H}\}$ ), in  $\text{Me}_2\text{SO}-d_6$ ,  $\text{MeOH}-d_4$  or  $\text{Me}_2\text{CO}-d_6$  solution. Chemical shifts are reported in p.p.m. ( $\delta$ ) relative to TMS. TLC plates coated with silica gel, were run in ethyl acetate and spots were detected by UV light. Microanalytical data were obtained using a Perkin Elmer PE2400 CHN Elemental Analyzer.

7-Chloro-*N*-methyl-4-quinolinamine (**1**), recrystallised from EtOH. Yield: 80%. Obs. (Calc.): C, 62.54 (62.34); H, 4.62 (4.71); N, 14.39 (14.53 %). NMR (400 MHz,  $\text{MeOH}-d_4$ )  $^1\text{H}$   $\delta$ : 8.36 (1H, d,  $J = 5.6$  Hz,  $\text{H}_2$ ), 8.00 (1H, d,  $J = 9.2$  Hz,  $\text{H}_5$ ), 7.77 (1H, d,  $J = 2.0$  Hz,  $\text{H}_8$ ), 7.37 (1H, dd,  $J = 9.2$  &  $2.0$  Hz,  $\text{H}_6$ ), 6.45 (1H, d,  $J = 5.6$  Hz,  $\text{H}_3$ ), 2.99 p.p.m. (3H, s, Me);  $^{13}\text{C}$   $\delta$ : 153.8, 152.6, 149.6, 136.4, 127.7, 126.1, 124.3, 118.9, 99.4, 29.9 p.p.m. LC/MS:  $m/z[\text{M} + 1]^+$ : 193. M. pt. 240 – 242 °C; lit. (T. J. Egan, R. Hunter, C. H. Kaschula, H. M. Marques, A. Mispilon and J. Walden, *J. Med. Chem.*, 2000, **43**, 283) M.pt. 245 °C (sublimes).

7-Chloro-*N*-propyl-4-quinolinamine (**2**), recrystallised from EtOH. Yield: 65%. Obs. (Calc.): C, 65.38 (65.30); H, 5.79 (5.93); N, 12.74 (12.69 %). NMR (500 MHz,  $\text{MeOH}-d_4$ )  $^1\text{H}$   $\delta$  8.32 (1H, d,  $J = 6.0$  Hz,  $\text{H}_2$ ), 8.08 (1H, d,  $J = 9.0$  Hz,  $\text{H}_5$ ), 7.76 (1H, d,  $J = 2.0$  Hz,  $\text{H}_8$ ), 7.36 (1H, dd,  $J = 9.0$  &  $2.0$  Hz,  $\text{H}_6$ ), 6.47 (1H, d,  $J = 6.0$  Hz,  $\text{H}_3$ ), 3.32-3.28 (2H, m,  $\text{NCH}_2$ ), 1.76 (2H, sextet.,  $J = 7.5$  Hz,  $\text{CH}_2\text{CH}_2\text{Me}$ ), 1.04 p.p.m. (3H, t,  $J = 7.5$  Hz, Me);  $^{13}\text{C}$   $\delta$ : 152.8, 152.3, 149.7, 136.3, 128.8, 125.9, 124.3, 118.8, 99.6, 45.8, 22.6, 11.9 p.p.m. LC/MS:  $m/z[\text{M}]^+$ : 220. M. pt. 144 – 147 °C; lit. (J. Bolte, C. Demuyne and J. Lhomme, *J. Med. Chem.*, 1976, **20**, 106) M. pt. 148 – 148.5 °C.

*N*-Butyl-7-chloro-quinolinamine (**3**), recrystallised from EtOH. Yield: 75%. Obs. (Calc.): C, 66.39 (66.52); H, 6.53 (6.44); N, 12.01 (11.93 %). NMR (500 MHz, MeOH- $d_4$ )  $^1\text{H}$   $\delta$ : 8.33 (1H, d,  $J = 5.5$  Hz, H<sub>2</sub>), 8.08 (1H, d,  $J = 9.0$  Hz, H<sub>5</sub>), 7.76 (1H, d,  $J = 2.0$  Hz, H<sub>8</sub>), 7.37 (1H, dd,  $J = 9.0$  & 2.0 Hz, H<sub>6</sub>), 6.48 (1H, d,  $J = 5.5$  Hz, H<sub>3</sub>), 3.35-3.31 (2H, m, NCH<sub>2</sub>), 1.72 (2H, qnt,  $J = 7.5$  Hz, NCH<sub>2</sub>CH<sub>2</sub>), 1.48 (2H, sextet,  $J = 7.5$  Hz, CH<sub>2</sub>Me), 1.00 p.p.m. (3H, t,  $J = 7.0$  Hz, Me);  $^{13}\text{C}$   $\delta$ : 152.8, 152.4, 149.7, 136.3, 127.6, 125.9, 124.3, 118.8, 99.6, 43.8, 31.6, 21.4, 14.2 p.p.m. LC/MS:  $m/z[M]^+$ : 234. M. pt. 132 – 135 °C; lit. (C. N. M. Bakker, *J. Lab. Comp. Radiopharm.*, 1978, **15**, 681) M. pt. 130 – 132 °C.

*N*-(2-Chloroethyl)-*N*-(7-chloro-4-quinolinyl)amine (**4**), recrystallised from MeOH. Yield: 93%. Obs. (Calc.): C, 57.35 (57.18); H, 4.52 (4.36); N, 12.42 (12.12 %). NMR (500 MHz, Me<sub>2</sub>CO- $d_6$ )  $^1\text{H}$   $\delta$ : 8.49 (1H, d,  $J = 5.0$  Hz, H<sub>2</sub>), 8.16 (1H, d,  $J = 9.0$  Hz, H<sub>5</sub>), 7.86 (1H, d,  $J = 2.0$  Hz, H<sub>8</sub>), 7.41 (1H, dd,  $J = 9.0$  and 2.0 Hz, H<sub>6</sub>), 6.93 (1H, s, NH), 6.63 (1H, t,  $J = 5.0$  Hz, H<sub>3</sub>), 3.89 (2H, q,  $J = 6.0$  Hz, NCH<sub>2</sub>), 3.81 p.p.m. (2H, t,  $J = 6.0$  Hz, CH<sub>2</sub>Cl); NMR (DMSO- $d_6$ )  $^{13}\text{C}$   $\delta$ : 153.0, 150.7, 150.6, 134.9, 129.3, 125.6, 123.8, 118.6, 100.0, 45.5, 42.9 p.p.m. M. pt. 131 °C.

*N*-(2-Azidoethyl)-7-chloro-quinolinylamine (**5**), recrystallised from EtOH. Yield: 46%. Obs. (Calc.): C, 53.20 (53.47); H, 4.22 (4.08); N, 27.95 (28.33 %). NMR (500 MHz, Me<sub>2</sub>CO- $d_6$ )  $^1\text{H}$   $\delta$ : 8.49 (1H, d,  $J = 5.0$  Hz, H<sub>2</sub>), 8.17 (1H, d,  $J = 9.0$  Hz, H<sub>5</sub>), 7.85 (1H, d,  $J = 2.0$  Hz, H<sub>8</sub>), 7.40 (1H, dd,  $J = 9.0$  & 2.0 Hz, H<sub>6</sub>), 6.89 (1H, s, NH), 6.64 (1H, d,  $J = 5.5$  Hz, H<sub>3</sub>), 3.72-3.62 p.p.m. (4H, m, CH<sub>2</sub>CH<sub>2</sub>); NMR (DMSO- $d_6$ )  $^{13}\text{C}$   $\delta$ : 153.0, 150.5, 150.7, 134.9, 129.2, 125.5, 123.9, 118.7, 100.0, 50.4, 43.2 p.p.m. LC/MS:  $m/z[M - 1]$ : 246. M. pt. 145 – 148 °C.

2-[(7-Chloro-4-quinolinyl)amino]ethanol (**6**), recrystallised from EtOH. Yield: 93%. Obs. (Calc.): C, 59.21 (59.33); H, 5.17 (4.98); N, 12.74 (12.57 %). NMR (400 MHz, DMSO- $d_6$ )  $^1\text{H}$   $\delta$ : 8.38 (1H, d,  $J = 5.4$  Hz, H<sub>2</sub>), 8.26 (1H, d,  $J = 9.0$  Hz, H<sub>5</sub>), 7.78 (1H, d,  $J = 2.1$  Hz, H<sub>8</sub>), 7.56 (1H, dd,  $J = 9.0$  & 2.1 Hz, H<sub>6</sub>), 7.25 (1H, t,  $J = 5.0$  Hz, NH), 6.49 (1H, d,  $J = 5.4$  Hz, H<sub>3</sub>), 4.84 (1H, t,  $J = 5.5$  Hz, OH), 3.66 (2H, q,  $J = 5.9$  Hz) & 3.35 p.p.m. (2H, q,  $J = 5.9$  Hz, CH<sub>2</sub>CH<sub>2</sub>);  $^{13}\text{C}$   $\delta$ : 151.8, 150.2, 149.1, 133.3, 127.5, 124.0, 124.0, 117.4, 98.7, 58.8, 45.1 p.p.m. LC/MS:  $m/z[M + 1]$ : 223. M. pt. 212 – 214 °C, lit. (T. J. Egan, R.

Hunter, C. H. Kaschula, H. M. Marques, A. Misplon and J. Walden, *J. Med. Chem.*, 2000, **43**, 283) 217 – 219 °C.

2-[(7-Chloro-4-quinolinyl)amino]-1-butanol (**7**), recrystallised from MeOH. Yield: 75%. Obs. (Calc.): C, 62.45 (62.27); H, 6.11 (6.03); N, 10.97 (11.17 %). NMR (400 MHz, MeOH- $d_4$ )  $^1\text{H}$   $\delta$ : 8.33 (1H, d,  $J = 5.6$  Hz, H<sub>2</sub>), 8.18 (1H, d,  $J = 8.8$  Hz, H<sub>5</sub>), 7.77 (1H, d,  $J = 2.0$  Hz, H<sub>8</sub>), 7.38 (1H, dd,  $J = 8.8$  & 2.0 Hz, H<sub>6</sub>), 6.59 (1H, d,  $J = 5.6$  Hz, H<sub>3</sub>), 3.74-3.69 (2H, m, NCH<sub>2</sub> & CH<sub>2</sub>OH), 1.88-1.66 (2H, m, CH<sub>2</sub>Me), 1.02 p.p.m. (3H, t,  $J = 7.6$  Hz, Me);  $^{13}\text{C}$   $\delta$ : 153.0, 152.4, 149.9, 136.5, 127.6, 126.1, 124.5, 118.9, 100.2, 64.4, 57.6, 25.2, 11.1. LC/MS: m/z[M - 1]: 249. M .pt. 150 °C.

(2*S*)-2-[(7-Chloro-4-quinolinyl)amino]-1-butanol (**8**), recrystallised from Me<sub>2</sub>CO. Yield: 70%. Obs. (Calc.): C, 62.14 (62.27); H, 6.20 (6.03); N, 11.31 (11.17 %). NMR (500 MHz, MeOH- $d_4$ )  $^1\text{H}$   $\delta$ : 8.33 (1H, d,  $J = 5.5$  Hz, H<sub>2</sub>), 8.20 (1H, d,  $J = 9.2$  Hz, H<sub>5</sub>), 7.77 (1H, d,  $J = 2.0$  Hz, H<sub>8</sub>), 7.41 (1H, dd,  $J = 9.2$  & 2.0 Hz, H<sub>6</sub>), 6.62 (1H, d,  $J = 5.5$  Hz, H<sub>3</sub>), 3.72-3.68 (2H, m, NCH<sub>2</sub> & CH<sub>2</sub>OH), 1.88-1.66 (2H, m, CH<sub>2</sub>Me), 1.02 p.p.m. (3H, t,  $J = 7.5$  Hz, Me);  $^{13}\text{C}$   $\delta$ : 153.1, 152.2, 149.7, 136.7, 127.5, 126.1, 124.6, 119.0, 100.2, 64.4, 57.5, 25.2, 11.1 p.p.m. LC/MS: m/z[M - 1]: 249. M .pt. 197 – 199 °C.
